# Supplementary material for: Reversible transformation of sub-nanometer Ga-based clusters to isolated [4]Ga(4Si) sites creates active centers for propane dehydrogenation
Source: Royal Society of Chemistry journal article supplement (doi:10.1039/d3cy01446k), 2023-11-27
Supplement: d3cy01446k1.pdf [file d3cy01446k1.pdf]

## Supporting Information

### Reversible Transformation of Sub-nanometer Ga-based Clusters to Isolated $[^4\text{Ga}_{(4\text{Si})}]$ Sites Creates Active Centers for Propane Dehydrogenation

Zixuan Chen,<sup>1</sup> Alexander I. Serykh,<sup>2</sup> Agnieszka Kierzkowska,<sup>1</sup> David Gajan,<sup>3</sup> Scott R. Docherty,<sup>4</sup> Alexander V. Yakimov,<sup>4</sup> Paula M. Abdala,<sup>1</sup> Christophe Copéret,<sup>4</sup> Pierre Florian,<sup>5\*</sup> Alexey Fedorov,<sup>1\*</sup> Christoph R. Müller<sup>1\*</sup>

<sup>1</sup> Department of Mechanical and Process Engineering, ETH Zürich, Switzerland

<sup>2</sup> Zelinsky Institute of Organic Chemistry, RAS, Moscow, Russia

<sup>3</sup> Centre de RMN à hauts champs de Lyon, Université de Lyon, UMR 5082 (CNRS, ENS Lyon, Université Lyon 1), Villeurbanne F-69100, France

<sup>4</sup> Department of Chemistry and Applied Biosciences, ETH Zürich, Switzerland

<sup>5</sup> CNRS, CEMHTI UPR3079, Université d'Orléans, France

Emails: [pierre.florian@cnrs-orleans.fr](mailto:pierre.florian@cnrs-orleans.fr); [fedoroal@ethz.ch](mailto:fedoroal@ethz.ch); [fedoroyal@ethz.ch](mailto:fedoroyal@ethz.ch); [muelchri@ethz.ch](mailto:muelchri@ethz.ch)

## FIGURES

|                                                                                                                                                                                                                                                                                                               |   |
|---------------------------------------------------------------------------------------------------------------------------------------------------------------------------------------------------------------------------------------------------------------------------------------------------------------|---|
| <b>Figure S1.</b> XRD pattern of Ga1 <sub>(650)</sub> . .....                                                                                                                                                                                                                                                 | 3 |
| <b>Figure S2.</b> XANES comparison of Ga1 <sub>(500-air)</sub> , Ga1 <sub>(650)</sub> and the reference material Ga(acac) <sub>3</sub> . .....                                                                                                                                                                | 3 |
| <b>Figure S3.</b> Ga K-edge Fourier transformed EXAFS functions (non-phase corrected) of Ga1 <sub>(500-air)</sub> and Ga1 <sub>(650)</sub> collected at 50 °C. ....                                                                                                                                           | 4 |
| <b>Figure S4.</b> EXAFS fittings of Ga1 <sub>(500-air)</sub> at Ga K-edge: magnitude (top) and imaginary (bottom) parts of the FT in R space. ....                                                                                                                                                            | 4 |
| <b>Figure S5.</b> EXAFS fittings of Ga1 <sub>(650)</sub> at Ga K-edge: magnitude (top) and imaginary (bottom) parts of the FT in R space. ....                                                                                                                                                                | 5 |
| <b>Figure S6.</b> Wavelet transform (WT) analysis of EXAFS data for Ga1 <sub>(500-air)</sub> in the R range: (a) 0.5-4 Å and (b) 2-4 Å. ....                                                                                                                                                                  | 5 |
| <b>Figure S7.</b> Wavelet transform (WT) analysis of EXAFS data for Ga1 <sub>(650)</sub> in the R range: (a) 0.5-4 Å and (b) 2-4 Å. ....                                                                                                                                                                      | 5 |
| <b>Figure S8.</b> (a) ADF-STEM image and (b) EDX mapping of Ga1 <sub>(650-air)</sub> . ....                                                                                                                                                                                                                   | 6 |
| <b>Figure S9.</b> (a) Atomic and weight percentage of Ga content, (b) EDX spectrum and (c) ADF-STEM image and EDX mappings of a selected area of Ga1 <sub>(650-air)</sub> . ....                                                                                                                              | 6 |
| <b>Figure S10.</b> FTIR spectra of SOMC-prepared Ga@SiO <sub>2</sub> after evacuation at 650 °C and CO adsorption at a pressure of 20 Torr at room temperature. ....                                                                                                                                          | 7 |
| <b>Figure S11.</b> FTIR spectra of SiO <sub>2</sub> in the hydroxyl region outgassed at 300, 400 or 550 °C. ....                                                                                                                                                                                              | 7 |
| <b>Figure S12.</b> FTIR comparison of the hydroxyl region of SiO <sub>2</sub> and Ga1 <sub>(500-air)</sub> after evacuation at 300 °C. ....                                                                                                                                                                   | 8 |
| <b>Figure S13.</b> Comparison of the <sup>71</sup> Ga MAS NMR spectra (obtained at 20.0 T with a spinning rate of 64 kHz) of Ga1 <sub>(500-air)</sub> and Ga1 <sub>(650-air)</sub> alongside the reference β-Ga <sub>2</sub> O <sub>3</sub> . ....                                                            | 8 |
| <b>Figure S14.</b> Propane conversion and product formation rate (mg h <sup>-1</sup> g <sub>cat</sub> <sup>-1</sup> ) of C <sub>3</sub> H <sub>6</sub> (blue), C <sub>2</sub> H <sub>4</sub> (green) and CH <sub>4</sub> (yellow) on Ga1 <sub>(650)</sub> over 20 h TOS. ....                                 | 9 |
| <b>Figure S15.</b> Normalized propene formation rate (g <sub>C<sub>3</sub>H<sub>6</sub></sub> h <sup>-1</sup> g <sub>Ga</sub> <sup>-1</sup> m <sup>-2</sup> ) on Ga1 <sub>(650)</sub> over 25 h (5 × 5 h) TOS including four regeneration cycles (synthetic air, 550 °C, 1 h) performed after every 5 h. .... | 9 |

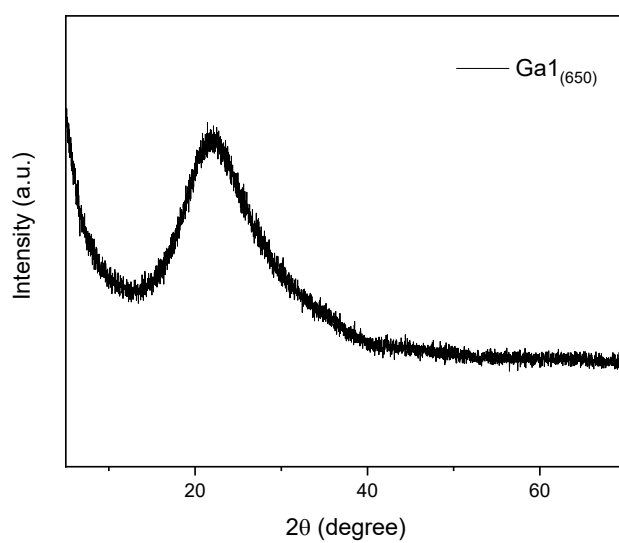

**Figure S1.** XRD pattern of Ga1<sub>(650)</sub>.

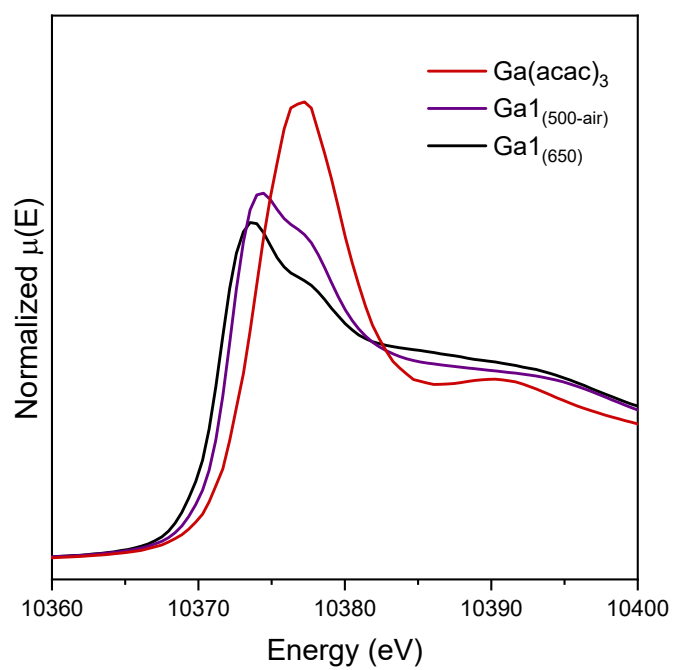

**Figure S2.** XANES comparison of Ga1<sub>(500-air)</sub>, Ga1<sub>(650)</sub> and the reference material Ga(acac)<sub>3</sub>.

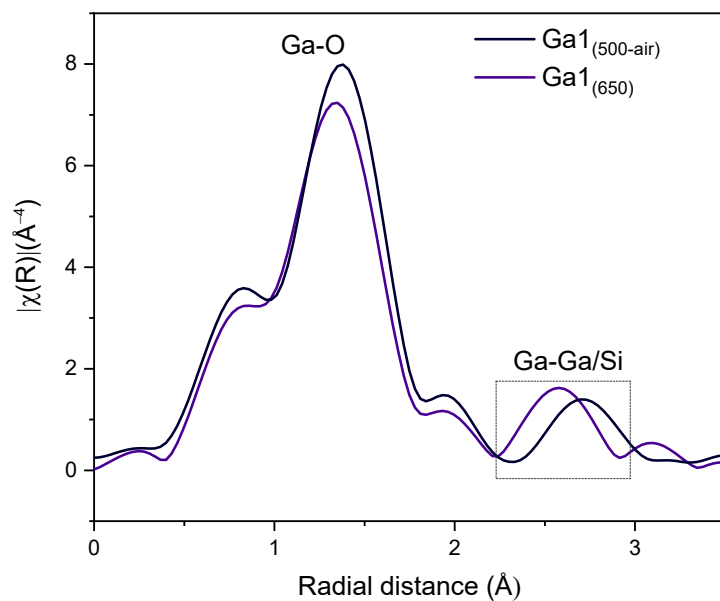

**Figure S3.** Ga K-edge Fourier transformed EXAFS functions (non-phase corrected) of  $\text{Ga1}_{(500\text{-air})}$  and  $\text{Ga1}_{(650)}$  collected at 50 °C.

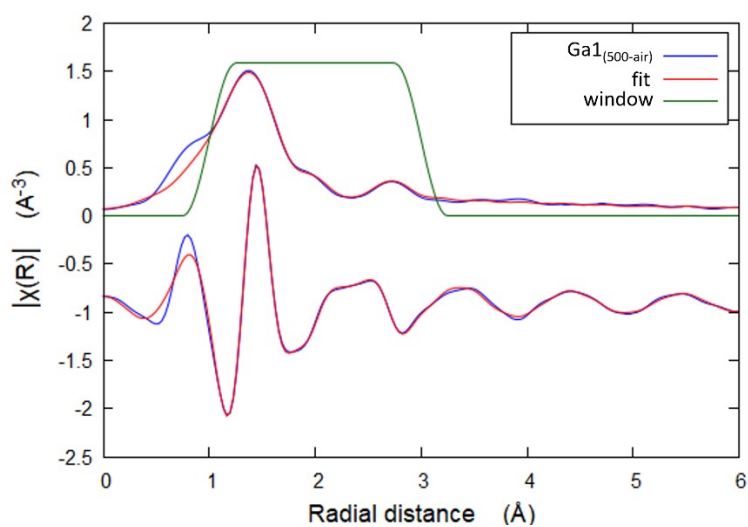

**Figure S4.** EXAFS fittings of  $\text{Ga1}_{(500\text{-air})}$  at Ga K-edge: magnitude (top) and imaginary (bottom) parts of the FT in R space.

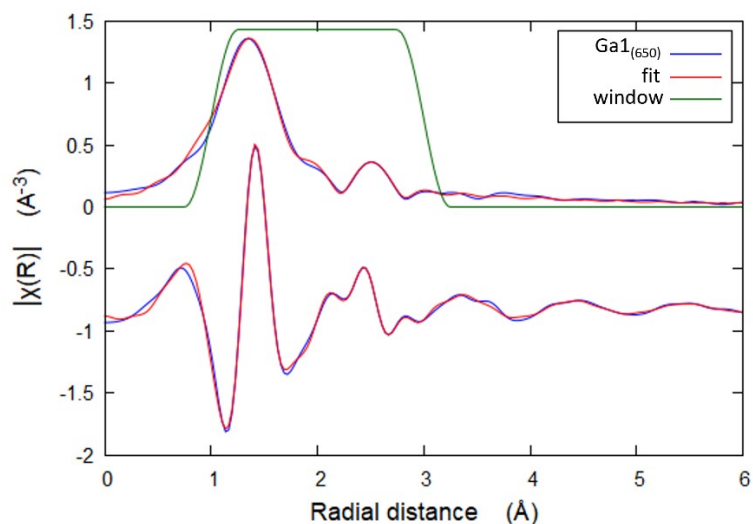

**Figure S5.** EXAFS fittings of  $\text{Ga1}_{(650)}$  at Ga K-edge: magnitude (top) and imaginary (bottom) parts of the FT in R space.

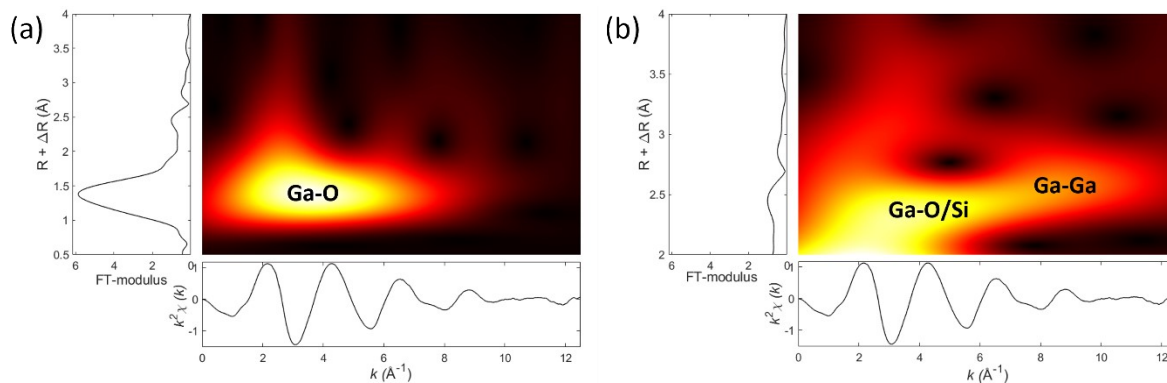

**Figure S6.** Wavelet transform (WT) analysis of EXAFS data for  $\text{Ga1}_{(500\text{-air})}$  in the R range: (a) 0.5-4 Å and (b) 2-4 Å.

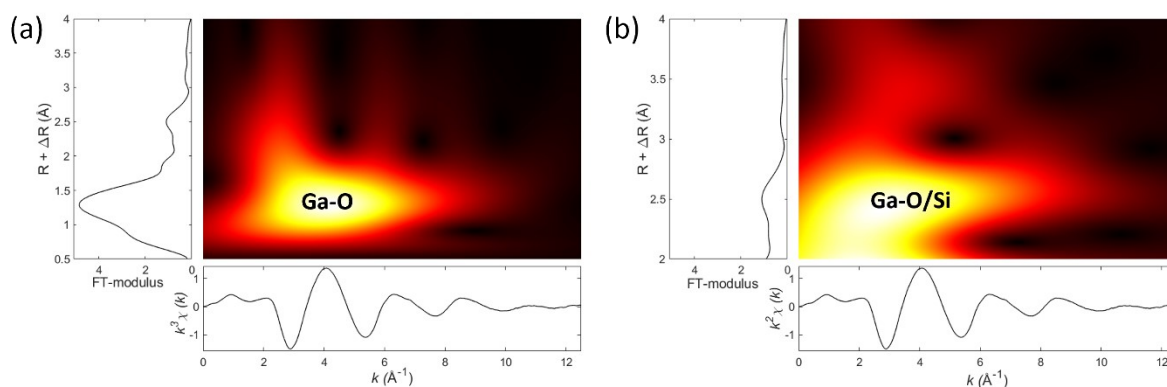

**Figure S7.** Wavelet transform (WT) analysis of EXAFS data for  $\text{Ga1}_{(650)}$  in the R range: (a) 0.5-4 Å and (b) 2-4 Å.

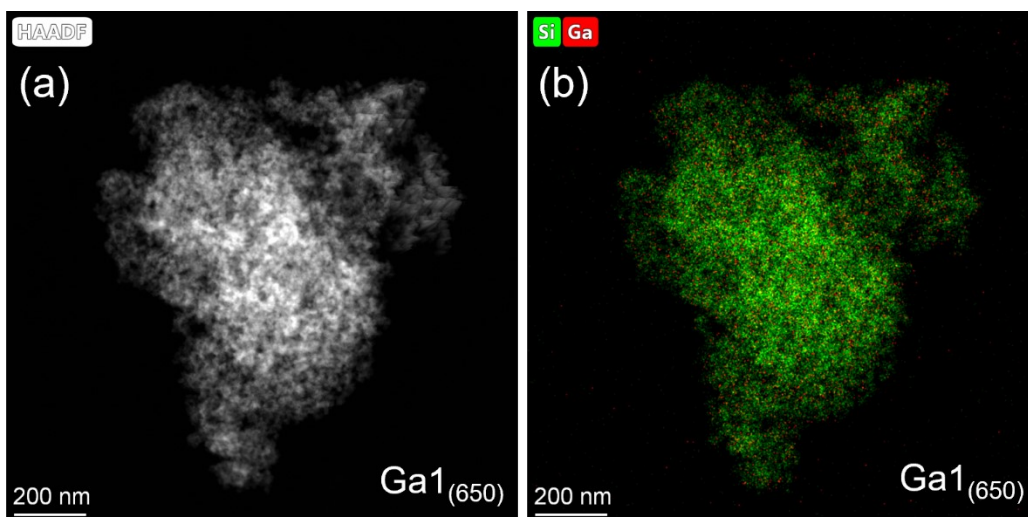

**Figure S8.** (a) ADF-STEM image and (b) EXD mapping of  $\text{Ga1}_{(650\text{-air})}$ .

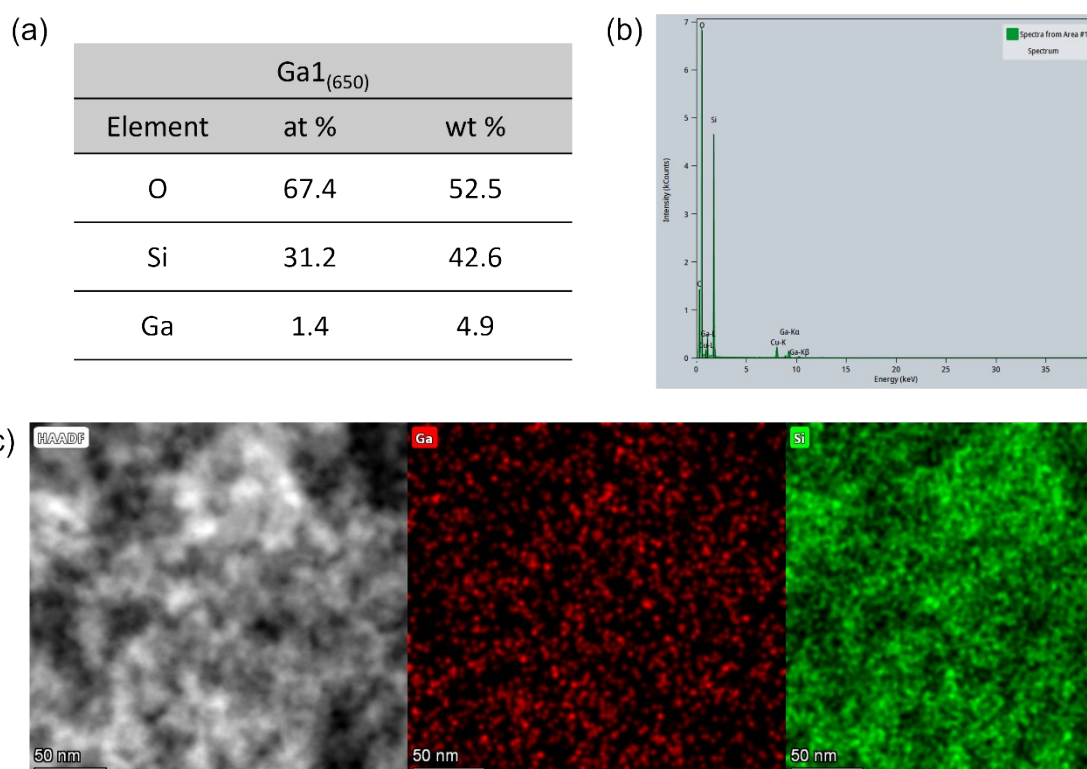

**Figure S9.** (a) Atomic and weight percentage of Ga content, (b) EDX spectrum and (c) ADF-STEM image and EDX mappings of a selected area of  $\text{Ga1}_{(650\text{-air})}$ .

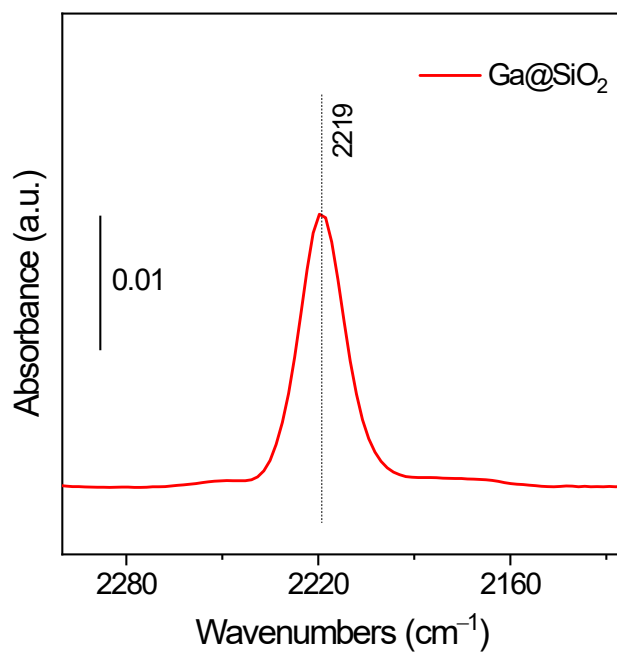

**Figure S10.** FTIR spectra of SOMC-prepared Ga@SiO<sub>2</sub> after evacuation at 650 °C and CO adsorption at a pressure of 20 Torr at room temperature.

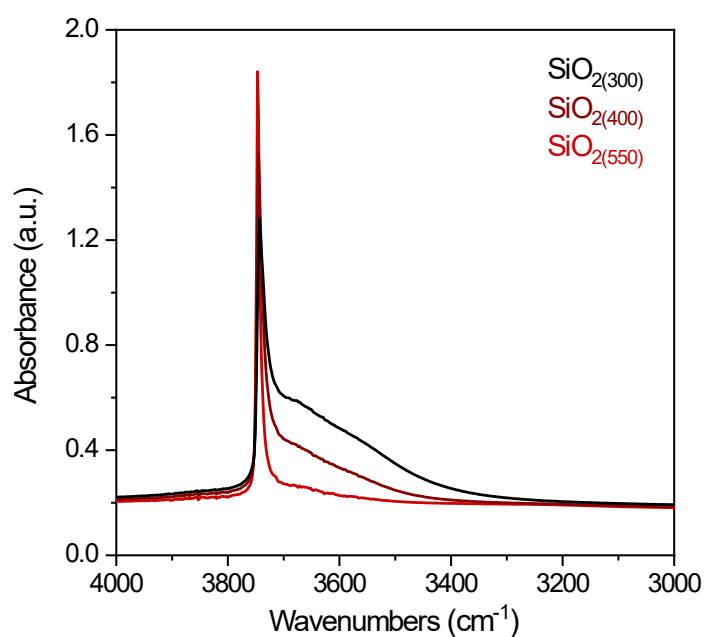

**Figure S11.** FTIR spectra of SiO<sub>2</sub> in the hydroxyl region outgassed at 300, 400 or 550 °C.

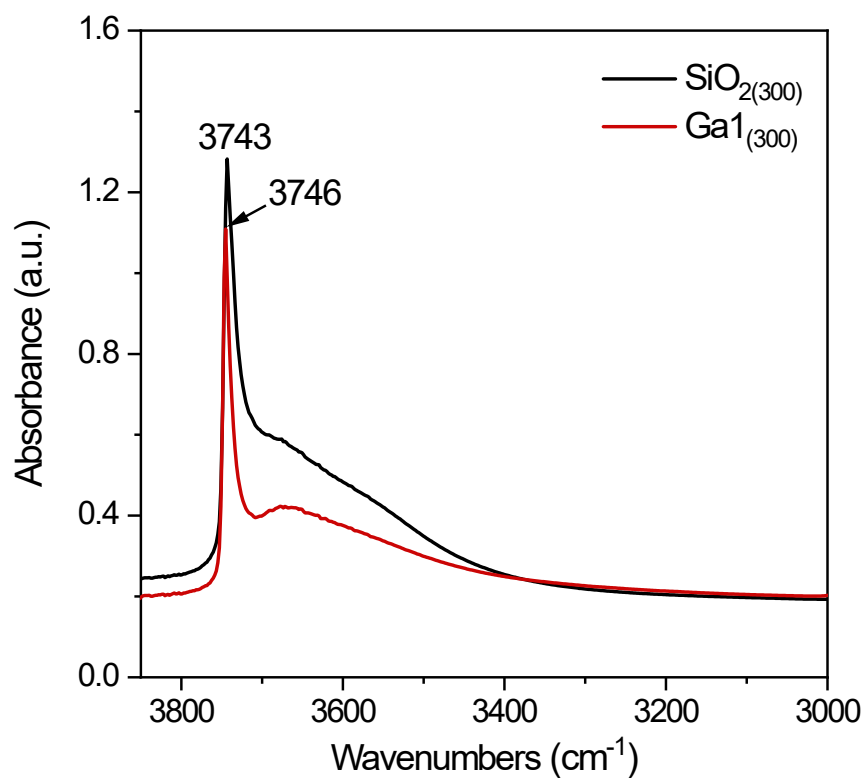

**Figure S12.** FTIR comparison of the hydroxyl region of  $\text{SiO}_2$  and  $\text{Ga1}_{(500\text{-air})}$  after evacuation at 300 °C.

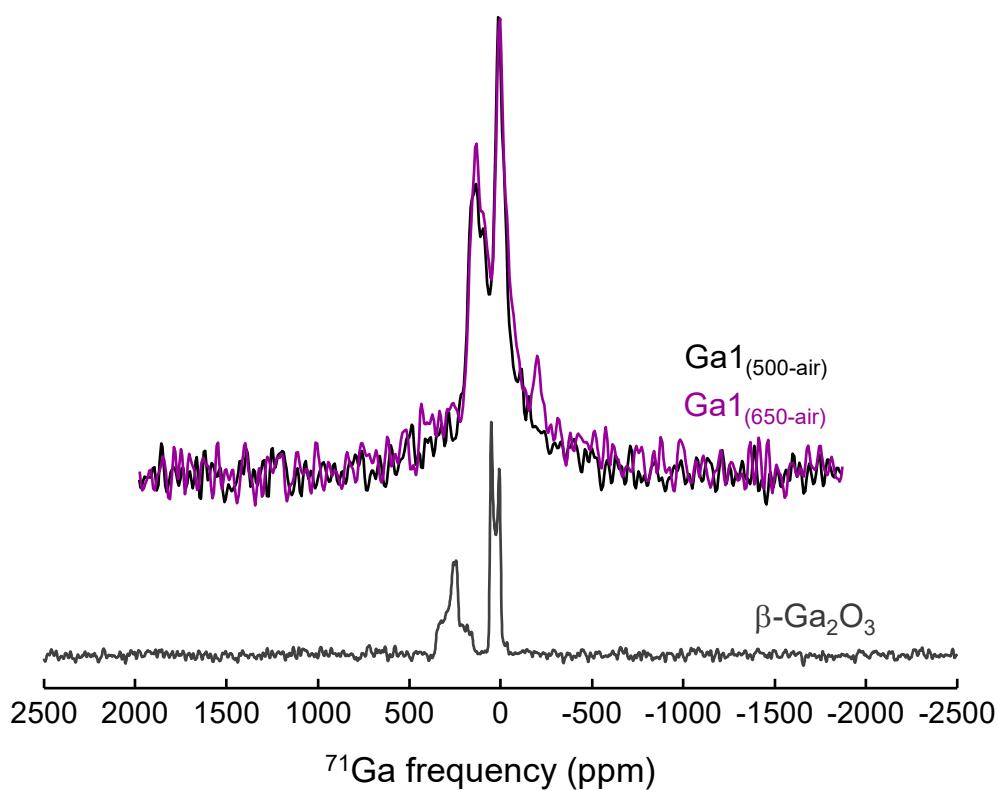

**Figure S13.** Comparison of the  $^{71}\text{Ga}$  MAS NMR spectra (obtained at 20.0 T with a spinning rate of 64 kHz) of  $\text{Ga1}_{(500\text{-air})}$  and  $\text{Ga1}_{(650\text{-air})}$  alongside the reference  $\beta\text{-Ga}_2\text{O}_3$ .



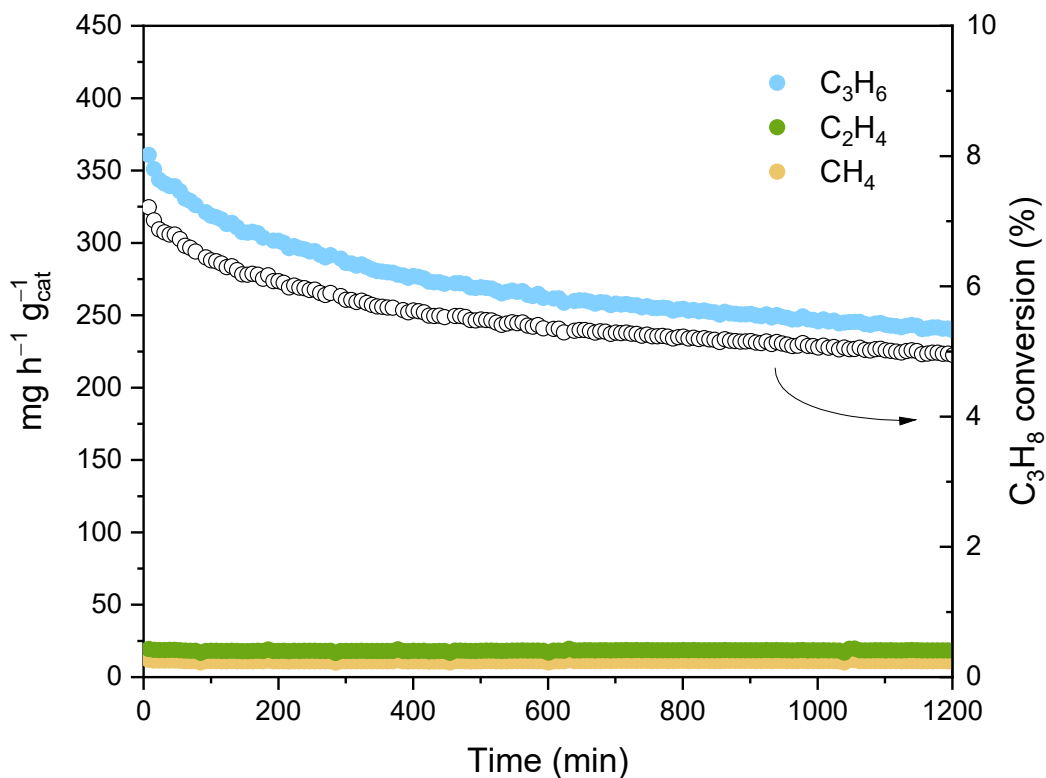

**Figure S14.** Propane conversion and product formation rate ( $\text{mg h}^{-1} \text{g}_{\text{cat}}^{-1}$ ) of  $\text{C}_3\text{H}_6$  (blue),  $\text{C}_2\text{H}_4$  (green) and  $\text{CH}_4$  (yellow) on  $\text{Ga1}_{(650)}$  over 20 h TOS.

Reaction conditions: 10% of  $\text{C}_3\text{H}_8$  in  $\text{N}_2$ ,  $\text{WHSV} = 8.5 \text{ h}^{-1}$ ,  $T = 550 \text{ }^\circ\text{C}$ .

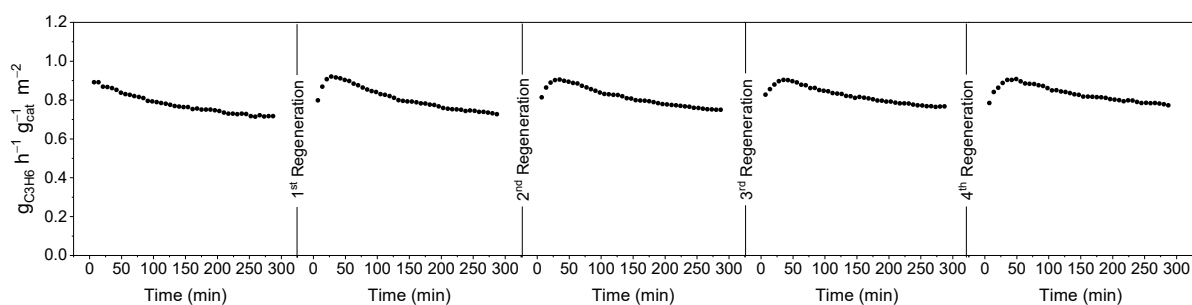

**Figure S15.** Normalized propene formation rate ( $\text{g}_{\text{C}_3\text{H}_6} \text{h}^{-1} \text{g}_{\text{Ga}}^{-1} \text{m}^{-2}$ ) on  $\text{Ga1}_{(650)}$  over 25 h ( $5 \times 5 \text{ h}$ ) TOS including four regeneration cycles (synthetic air,  $550 \text{ }^\circ\text{C}$ , 1 h) performed after every 5 h.

Reaction conditions: 10% of  $\text{C}_3\text{H}_8$  in  $\text{N}_2$ ,  $\text{WHSV} = 8.5 \text{ h}^{-1}$ ,  $T = 550 \text{ }^\circ\text{C}$ . We assumed that the regeneration cycles did not change the surface area of  $\text{Ga1}_{(650)}$ .
